# Supplementary material
Source: PubMed Central journal article supplement (PMC4337815)
Supplement: NIHMS662736-supplement-Supplementary_Text_and_Figures.pdf [file NIHMS662736-supplement-Supplementary_Text_and_Figures.pdf]

# Supplementary Figure 1

**a**

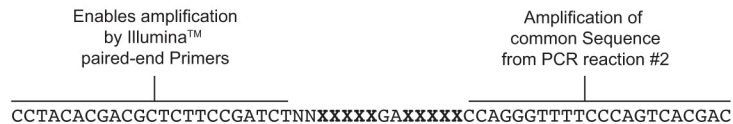

| Plate barcode | Row barcode |
|---------------|-------------|
| 1. GCAGA      | A. TAAGC    |
| 2. TCGAA      | B. TGCAC    |
| 3. AACAA      | C. CTCAG    |
| 4. GGTGC      | D. GGAAT    |
| 5. TTGGT      | E. CGAGG    |
| 6. CATTG      | F. AGGAG    |
| 7. ATTGG      | G. TGTTC    |
| 8. CGGTT      | H. CAACT    |
| 9. ATCCT      |             |
| 10. ATGTC     |             |
| 11. TCACG     |             |
| 12. AGACC     |             |
| 13. CCCCA     |             |
| 14. GCGCT     |             |
| 15. TCCTT     |             |
| 16. TATAT     |             |
| 17. CGTAA     |             |
| 18. AAGGT     |             |
| 19. AGCTC     |             |
| 20. CTTGC     |             |
| 21. GTATC     |             |
| 22. TATGA     |             |
| 23. CACAC     |             |
| 24. ACACT     |             |
| 25. ACTAC     |             |

**b**

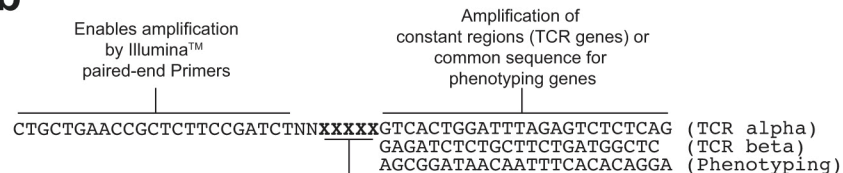

**Column barcode**

1. GTTCA
2. CAGGA
3. TTATA
4. CCTGT
5. ACCGC
6. ACTTA
7. GCTAG
8. GACGT
9. GGCTA
10. GAATG
11. CCAAC
12. GAGAC

**Supplementary Figure 1. Barcoding primer design.** (a) 5' primers incorporate barcodes that specify plate and row and bind and amplify a common sequence that is incorporated into all 5' primers from PCR reaction #2. The outside sequence allows for amplification using Illumina™ Paired-End primers. (b) 3' primers incorporate barcodes that specify column. The primers amplify nested constant region sequences for TCR $\alpha/\beta$  or a common sequence incorporated into all 3' cytokine primers. The outside sequence allows for amplification using Illumina™ paired-end primers.

## Supplementary Figure 2

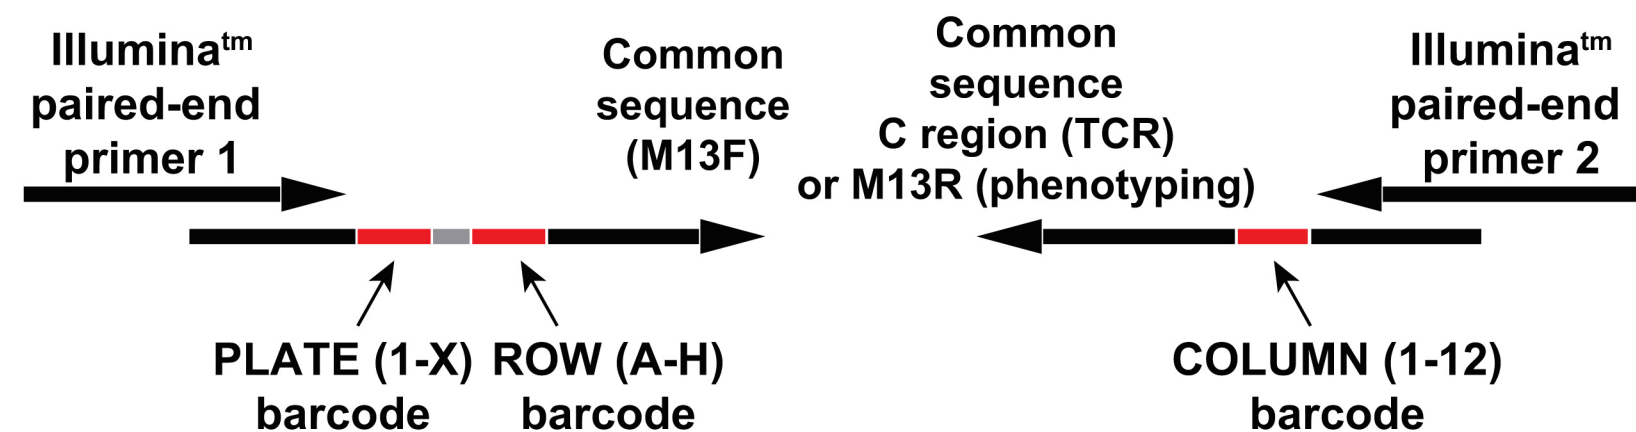

### COLUMN (1-12) barcodes added

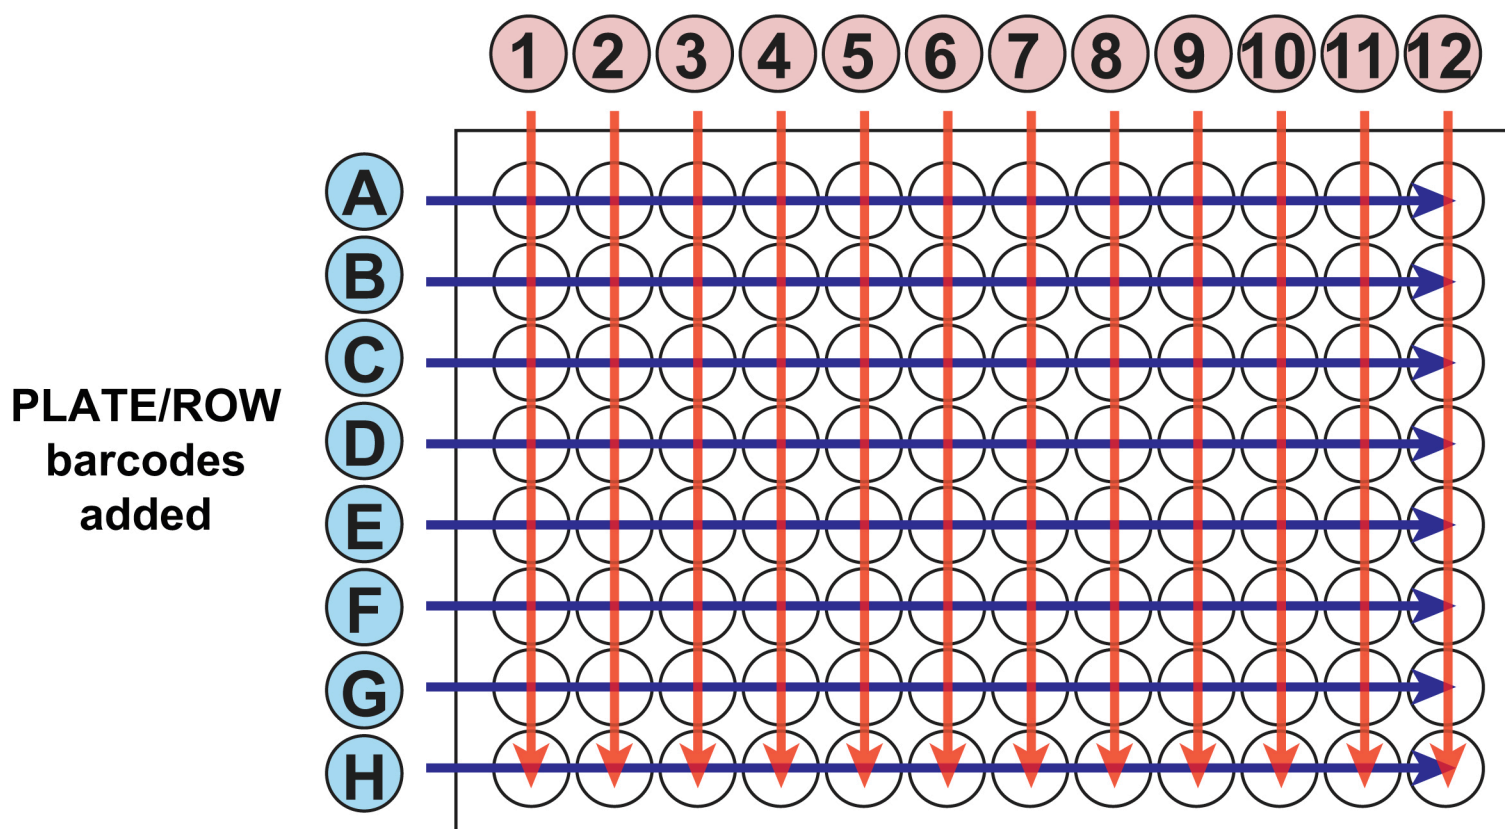

### Supplementary Figure 2. Schematic for barcoding (third) PCR reaction.

An aliquot from the second PCR reaction product is used as a template for this reaction. To each well within a particular row within a given plate, a distinct 5' primer is added by multichannel pipette that specifies row. To each well within a column, a distinct 3' primer is added by multichannel pipette that specifies column. The reaction is performed with Illumina™ paired-end primers in all wells, which enable sequencing on the Illumina™ MiSeq™ platform.

## Supplementary Figure 3

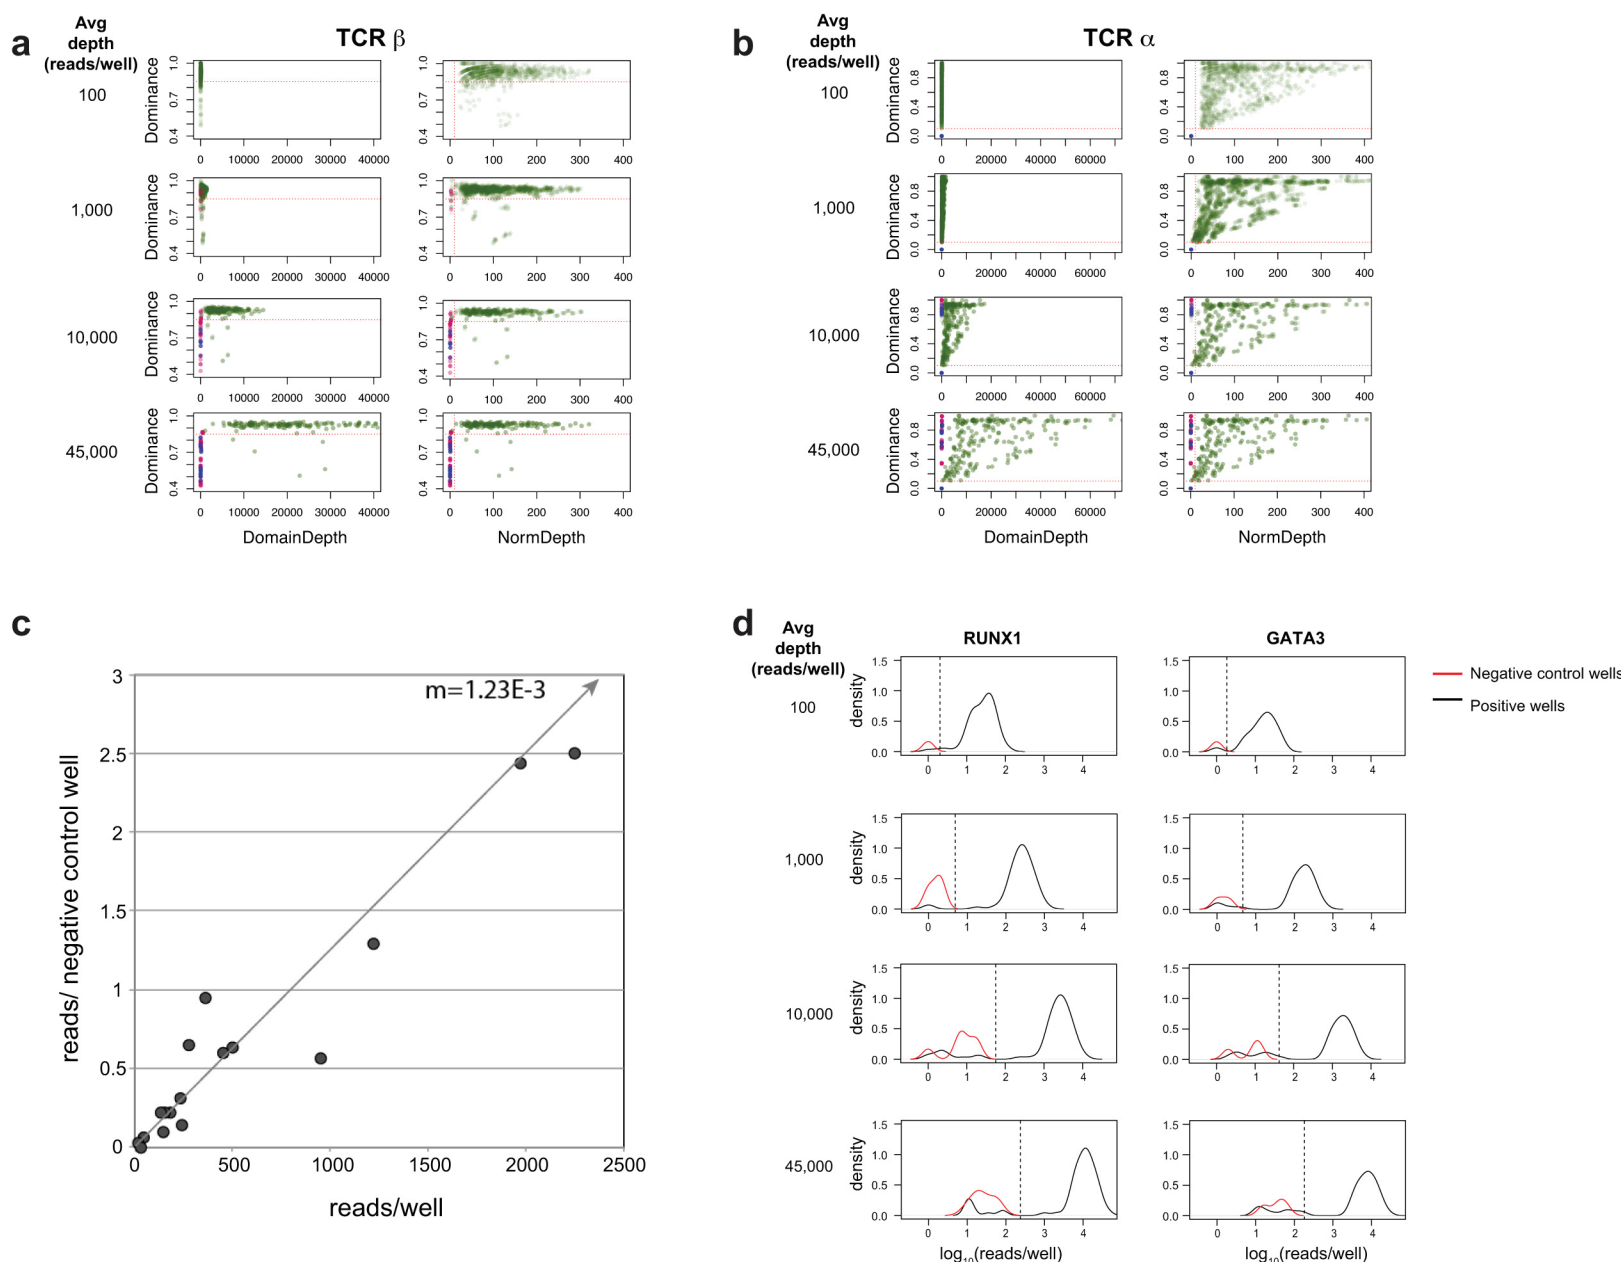

**Supplementary Figure 3. Validation of true-positive cutoff criteria by very deep sequencing (see Methods).** (a-b) TCR cutoff criteria. Two plates containing single cells and reagents (green dots), reagents but no cells (red), and neither reagents nor cells (blue), were subjected to TCR $\beta$  (a) or TCR $\alpha$  (b) sequencing to an average depth of over 45,000 reads per well. The plates were then randomly subsampled to depths ranging from 100 to 45,000 average reads per well (left column). Depths of 100, 1,000, 10,000 and 45,000 are shown. Left columns show raw number of TCR domain-specific reads per well (DomainDepth, x-axis) as a function of domain dominance of that TCR clone within the well (y-axis). Right columns shows normalized read number of TCR clones (NormDepth, x-axis) as a function of domain dominance of that TCR clone within the well (y-axis). NormDepth (Normalized Depth) is the ratio of raw domain-specific reads over the average number of domain-specific reads per well present in the sequencing run, and is used to normalize read number to exclude background regardless of number of sequencing depth. A NormDepth cutoff of 10% reliably excludes 100% of negative control wells across the dynamic range of 100 to 45,000 reads per well. For TCR analysis, samples were also evaluated based on Domain dominance, a measure of dominance of a single TCR sequence in all reads of that domain type (TCR $\beta$ , TCR $\alpha$ ) in the well. Domain dominance further excludes negative control wells and wells containing more than one cell or cross contaminating sequences. A Domain Dominance cutoff of  $> 85\%$  for TCR $\beta$  was established to exclude negative control wells, as well as wells potentially containing more than one sorted cell (a). The DomainDominance cutoff for TCR alpha was set at  $> 10\%$  to account for the possibility of multiple alpha chain expression (b). We apply both Domain Dominance cutoff and Normalized-Depth cutoffs in our analysis, to eliminate all negative control wells within a dynamic range of 100 to 45,000 reads per well. In all positive control wells, sequencing depth does not impact successful classification of the dominant clone's identity. (c) Background of phenotypic parameters as a function of total number of reads of that parameter on a given plate. Two plates, containing a combination of single stimulated T cells and negative control wells were analyzed for expression of phenotypic parameters. For each individual parameter, background reads (y-axis, reads per negative control well) is plotted in relation to total reads (x-axis, reads per well). The ratio of background reads/well to reads/well in all wells is  $\sim 1.23 \times 10^{-3}$ . (d) A single plate containing 80 wells with single T cells and 16 negative control wells was analyzed across the dynamic range of 100 to 45,000 reads per well. RUNX1 and GATA3, the two parameters containing the highest background, were assessed in 80 wells containing T cells and 16 negative control wells. Histogram depicts average read count per well (x-axis) and relative density (y-axis) for wells containing T cells (black) and negative control wells (red). Only wells containing at least 1 read for RUNX1 (left) or GATA3 (right) are shown. Dotted line represents 1 SD below the mean of log read counts per well of all wells containing reads, which is the cutoff established to exclude background.

# Supplementary Figure 4

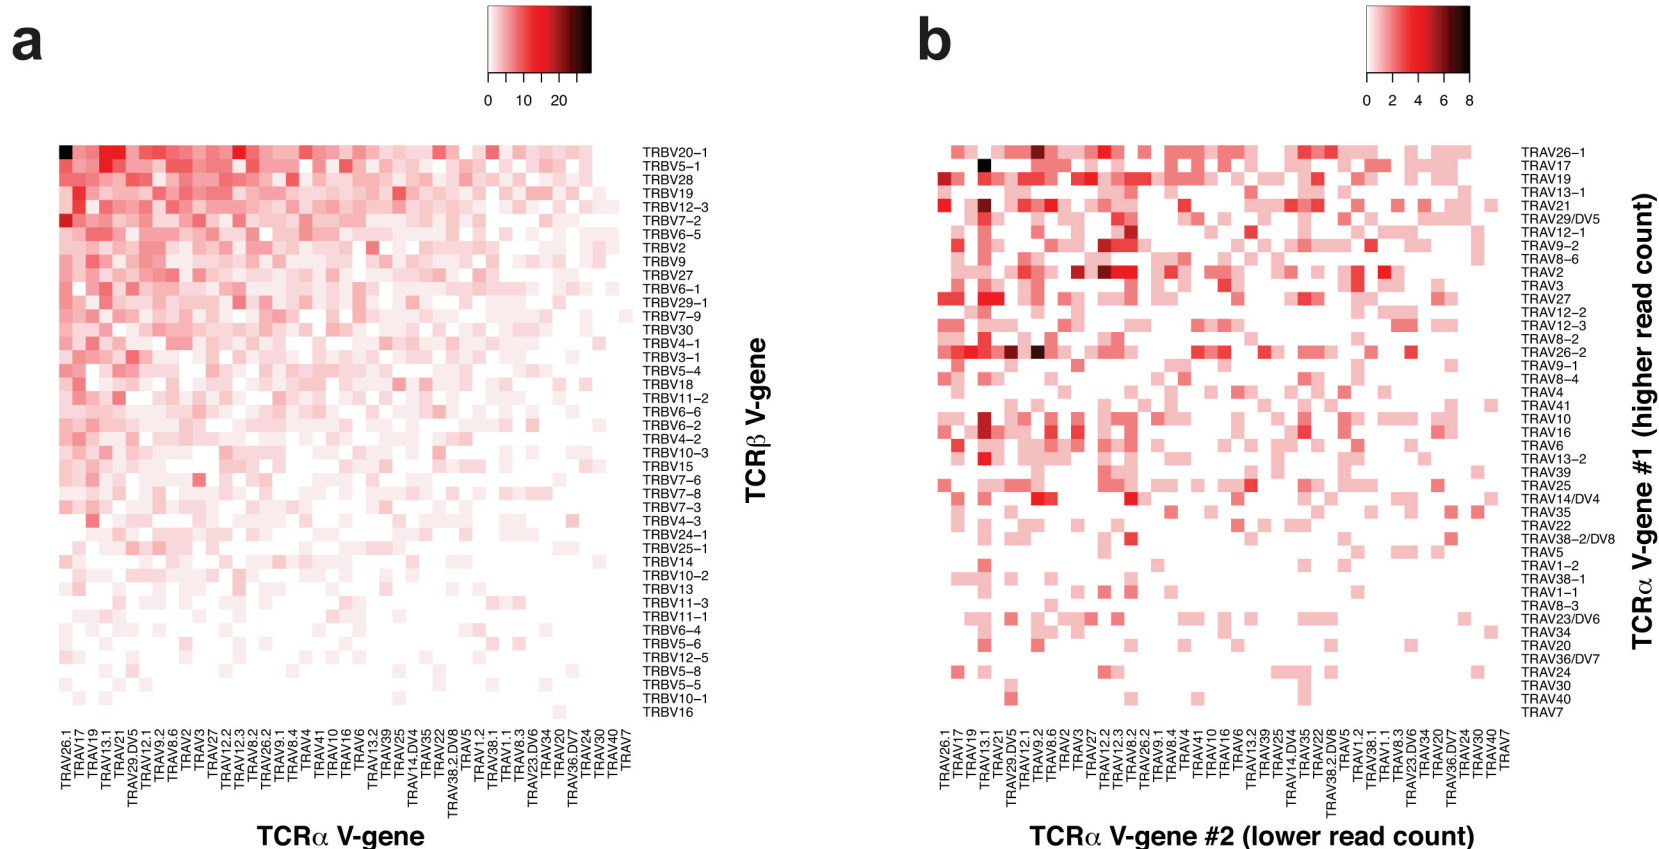

**Supplementary Figure 4. Human TCR V-gene usage in single T cells.** (a) Observed frequency of all possible TCR  $\alpha/\beta$  combinations observed in 2,721 non-redundant TCRs where a productive TCR $\beta$  gene and a single productive TCR $\alpha$  gene were obtained. For both TCR $\alpha$  and TCR $\beta$ , some V-genes are used at a higher frequency than others, and their combinations appear largely in proportion to independent abundance. (b) Observed frequency of all possible double TCR $\alpha$  combinations observed in 999 non-redundant TCRs where two TCR $\alpha$  chains were identified, one or more being productive. The dominantly detected gene is plotted on the y-axis, while the gene with lower read counts is plotted on the x-axis. Dual TCR $\alpha$  cells appear to select chains as a function of TCR $\alpha$  frequency and there is no systemic bias observed with respect to TCR $\alpha$  chain co-expression within a particular cell.

## Supplementary Figure 5

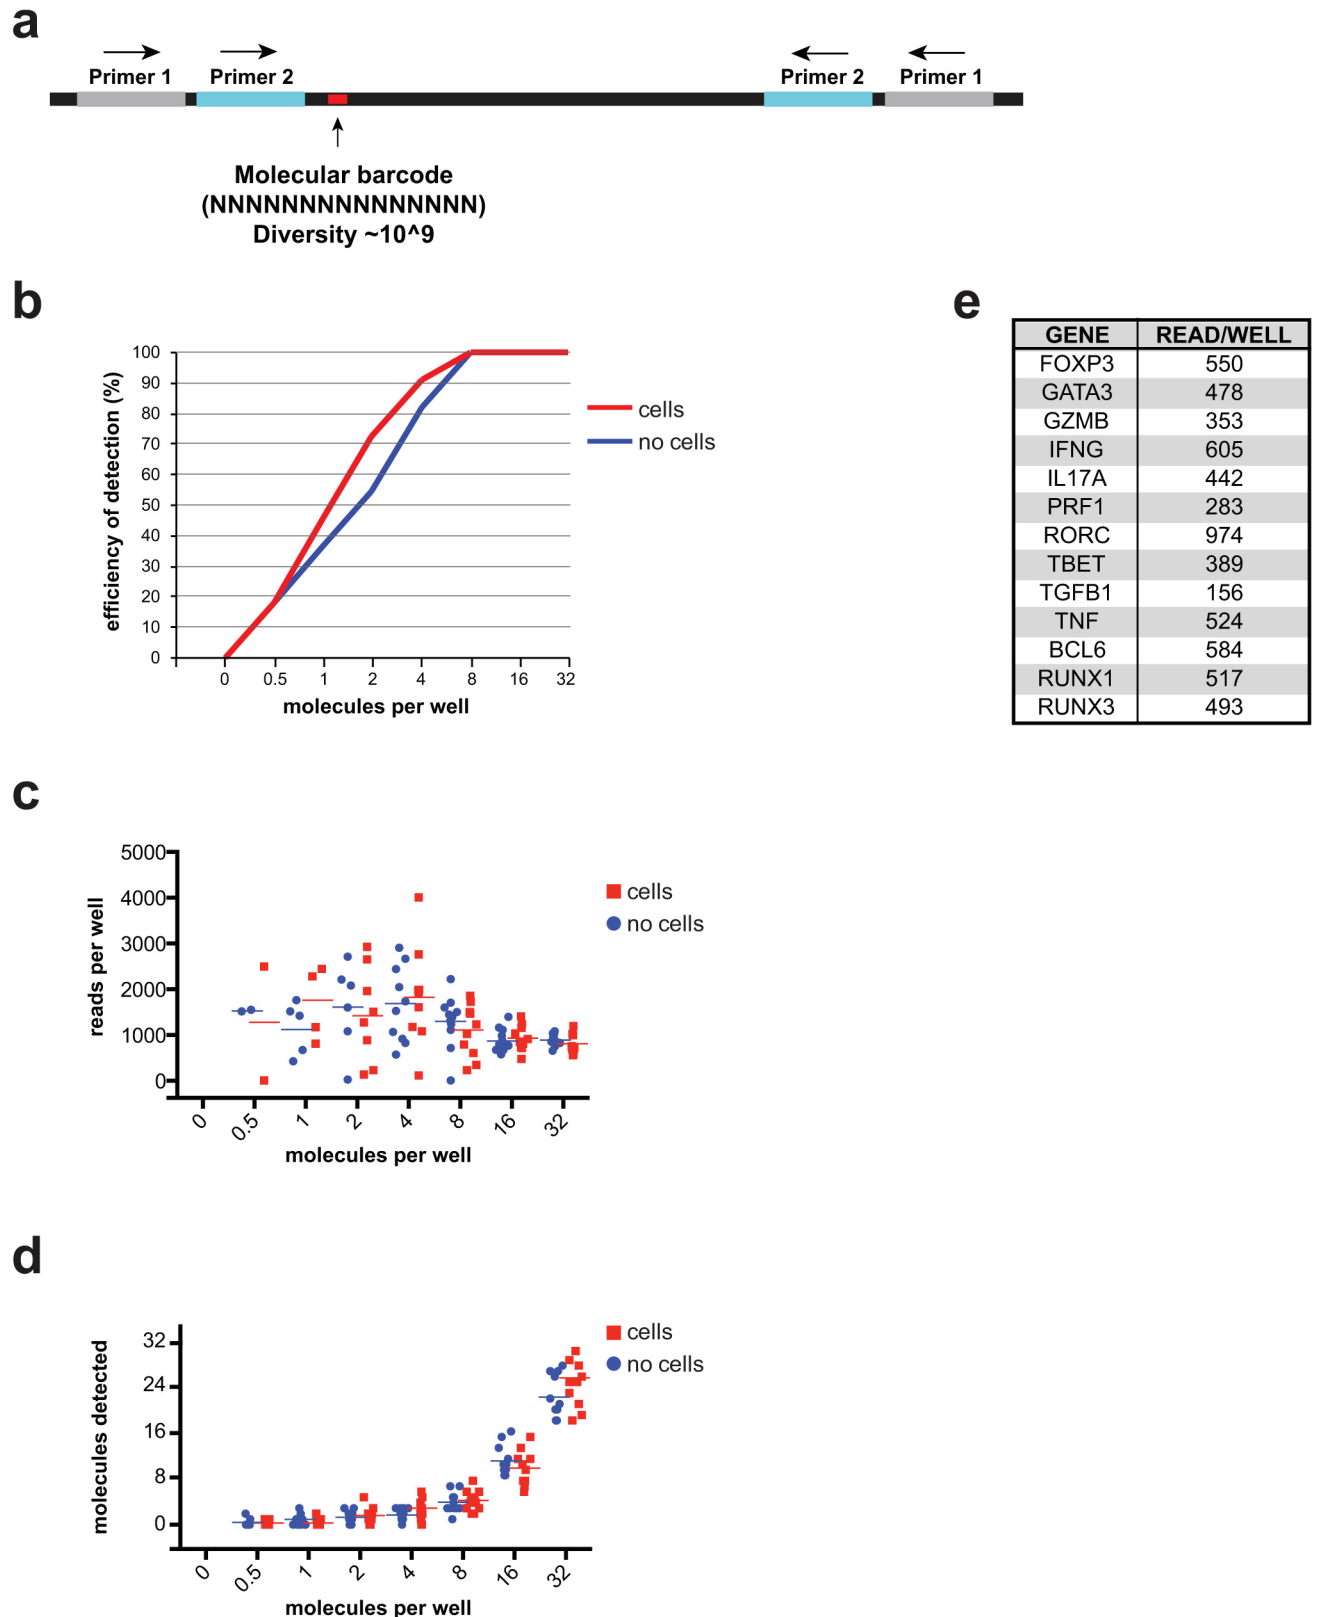

**Supplementary Figure 5. Analysis of the affect of transcript abundance on assay sensitivity and read count.** A synthetic IL-17 template (a) was spiked into 2 plates at various dilutions from 0 to 32 molecules per well (indicated on x-axis of plots in (b-d)). Into 1 of these 2 plates, a single stimulated T cell was also sorted into each well. One well from each row was left without template as a negative control. Subsequent RT-PCR reactions and analysis were performed per protocol. (a) Design of the synthetic IL-17 template, which contains primer sequences for amplification and a molecular barcode containing 15 random nucleotides. (b) Sensitivity of detection of exogenous IL-17 template. Sensitivity is scored as a percentage of wells (out of 11 total wells per dilution) where the template was detected as present. (c) Total reads of exogenous IL-17 template in wells where exogenous IL-17 template was detected above background. Two wells also containing endogenous IL-17 (from cells added to the wells) were excluded from the analysis. (d) Number of uniquely barcoded molecules detected per well. To account for the presence of sequencing and PCR error, a similarity threshold was set above which molecular barcodes were scored as being equivalent. No molecules sharing the same barcode were repeated throughout the plates. (e) Mean read counts per well of phenotypic parameters present in at least 50 cells within our tumor and colon T cell set.

## Supplementary Figure 6

| Clone | TRBV       | CDR3                                                                                          | TRBJ        |
|-------|------------|-----------------------------------------------------------------------------------------------|-------------|
| A(52) | TRBV<br>13 | C A S S L A S M G V G E L F F<br>tgt gcc agc agc cta gcg agt atg ggt gtc ggg gag ctg ttt ttt  | TRBJ<br>2-2 |
| B(8)  |            | C A S S S A S G G V G E L F F<br>tgt gcc agc agc t cg gca agc ggg gga gtc ggg gag ctg ttt ttt |             |

| Clone | TRAV         | CDR3                                                                                               | TRAJ       |
|-------|--------------|----------------------------------------------------------------------------------------------------|------------|
| A(52) | TRAV<br>38-2 | C A Y R P N Y G G A T N K L I F<br>tgt gct tat agg cca aat tat ggt ggt gct aca aac aag ctc atc ttt | TRAJ<br>32 |
| B(8)  |              | C A Y R P N Y G G A T N K L I F<br>tgt gct tat agg ccg aat tat ggt ggt gct aca aac aag ctc atc ttt |            |

**Supplementary Figure 6. Nucleic acid sequence of two expanded TIL T cell clones sharing an identical TCR alpha chain and similar TCR beta.** N-nucleotide additions are indicated in yellow. D-region sequence is indicated in grey.

# Supplementary Figure 7

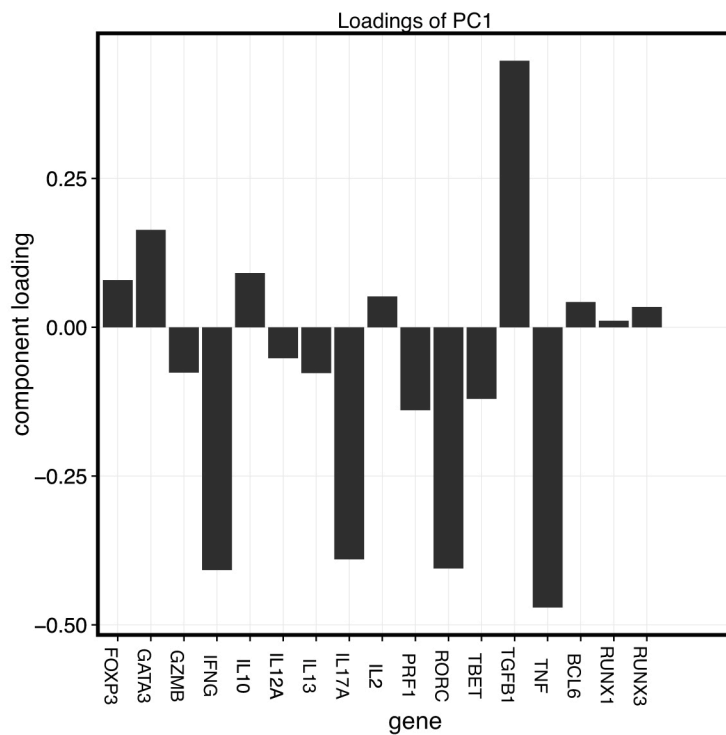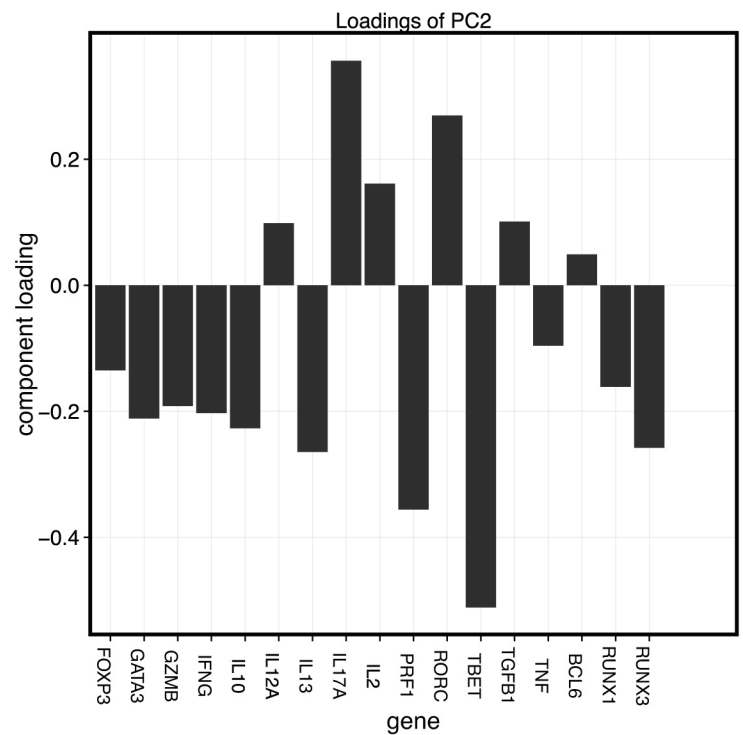

**Supplementary Figure 7. Principle component analysis parameter loadings for the PC1 and PC2, depicted in Fig. 3a.**

# Supplementary Figure 8

**a**

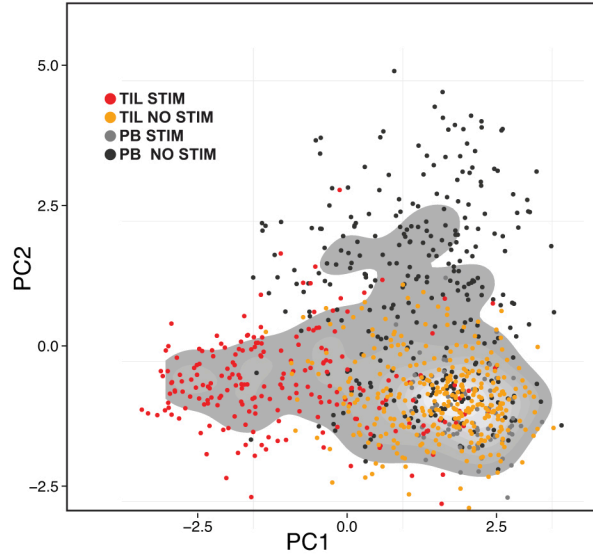

**b**

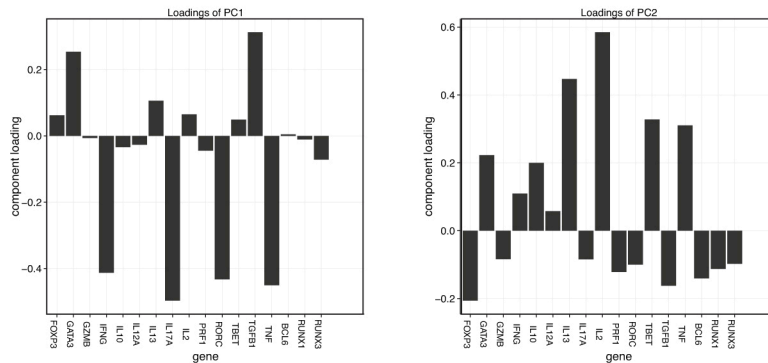

**c**

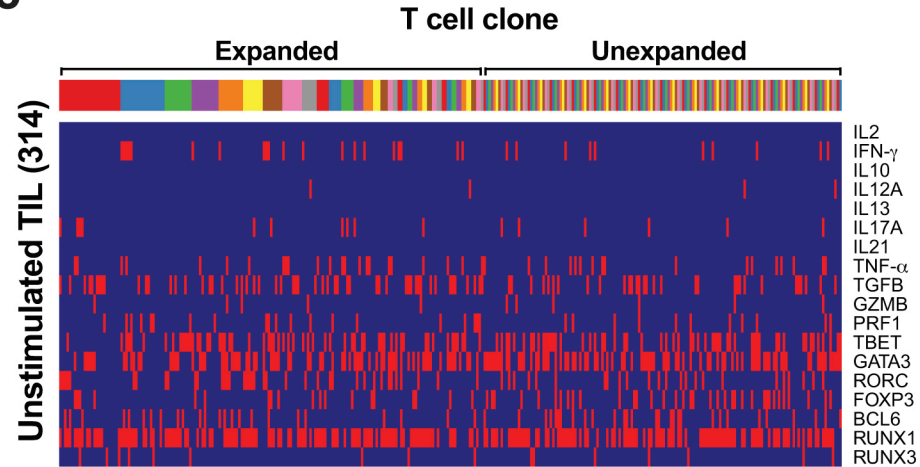

**Supplementary Figure 8. Analysis of stimulated vs. unstimulated CD4+ T cells from tumor and peripheral blood (a) Principle component analysis of unstimulated vs PMA/inomycin stimulated CD4+ T cells from tumor and peripheral blood. (b) Principle component analysis parameter loadings for the PC1 and PC2, depicted in (a) are shown. (c) Heat map showing multi-parametric phenotypic analysis from unstimulated CD4+ T cells from tumor. Individual T cells are grouped by TCR sequence. Each color on bar represents a distinct TCR sequence.**



# Supplementary Table 1

|                        |                               |                        |                                                   |
|------------------------|-------------------------------|------------------------|---------------------------------------------------|
| TRAV1, Reaction 1      | CTGCACGTACCAGACATCTGGGTT      | TRAV1, Reaction 2      | CCAGGGTTTTCCAGTCACGACAGGTCGTTTTTCTTCATCTCCTTAGTC  |
| TRAV2, Reaction 1      | GGCTCAAAGCCTTCTCAGCAGG        | TRAV2, Reaction 2      | CCAGGGTTTTCCAGTCACGACACGATAACAACATGACCTATGAACGG   |
| TRAV3, Reaction 1      | GGATAACCTGGTTAAAGGCAGCTA      | TRAV3.1, Reaction 2    | CCAGGGTTTTCCAGTCACGACCTTTGAAGCTGAATTTAACGAAGGCC   |
| TRAV4, Reaction 1      | GGATACAAGACAAAAGTTACAAACGA    | TRAV4.1, Reaction 2    | CCAGGGTTTTCCAGTCACGACCTCCCTGTTTATCCCTGCCGAC       |
| TRAV5, Reaction 1      | GCTGACGTATATTTTTTCAAATATGGA   | TRAV5.1, Reaction 2    | CCAGGGTTTTCCAGTCACGACAAAACAGACCAAGAGCTACTGTTC     |
| TRAV6, Reaction 1      | GGAAGAGGCCTGTTTTCTTGCT        | TRAV6, Reaction 2      | CCAGGGTTTTCCAGTCACGACAAGACTGAAGGTCACCTTTGATACC    |
| TRAV7, Reaction 1      | GCTGGATATGAGAAGCAGAAAGGA      | TRAV7, Reaction 2      | CCAGGGTTTTCCAGTCACGACATAAATGCTACATTTACTGAAGAATGG  |
| TRAV8, Reaction 1      | AGGACTCCAGCTTCTCCTGAAGTA      | TRAV8, Reaction 2      | CCAGGGTTTTCCAGTCACGACGCATCAACGGTTTTGAGGCTGAATTTAA |
| TRAV9, Reaction 1      | GTATGTCCAATATCCTGGAGAAGGT     | TRAV9, Reaction 2      | CCAGGGTTTTCCAGTCACGACGAAACCACTTCTTCCACTTGGAGAA    |
| TRAV10, Reaction 1     | CAGTGAGAACACAAGTCGAACGG       | TRAV10, Reaction 2     | CCAGGGTTTTCCAGTCACGACTACAGCAACTCTGGATGCAGACAC     |
| TRAV12.1, Reaction 1   | CCTAAGTTGCTGATGTCCTGATAC      | TRAV12, Reaction 2     | CCAGGGTTTTCCAGTCACGACGAAGATGGAAGGTTTACAGCAC       |
| TRAV12.2, Reaction 1   | GGGAAAAGCCTGAGTTGATAATGT      | TRAV13.1, Reaction 2   | CCAGGGTTTTCCAGTCACGACGACATTCGTTCAAATGTGGCGAA      |
| TRAV12.3, Reaction 1   | GCTGATGTACACATACTCCAGTGG      | TRAV13.2, Reaction 2   | CCAGGGTTTTCCAGTCACGACGCGCAAGGCCAAAGACTCACCT       |
| TRAV13.1, Reaction 1   | CCCTTGTGATAAGCAAGAACTTGG      | TRAV14, Reaction 2     | CCAGGGTTTTCCAGTCACGACTCCAGAGGCAAGAAATCCGCCA       |
| TRAV13.2, Reaction 1   | CCTCAATTCATTATAGACATTCGTTT    | TRAV16, Reaction 2     | CCAGGGTTTTCCAGTCACGACGCTGACCTTAAACAAAGGCGAGACA    |
| TRAV14, Reaction 1     | GCAAAATGCAACAGAGAGGTCGCTA     | TRAV17, Reaction 2     | CCAGGGTTTTCCAGTCACGACTTAAAGAGTCACGCTTGACACTTCCA   |
| TRAV16, Reaction 1     | TAGAGAGAGCATCAAAGGCTTCAC      | TRAV18, Reaction 2     | CCAGGGTTTTCCAGTCACGACGCAGAGGTTTTGAGGCGCAGTCT      |
| TRAV17, Reaction 1     | CGTTCAAATGAAAGAGAGAAACACAG    | TRAV19, Reaction 2     | CCAGGGTTTTCCAGTCACGACTCCACAGTCTCCTCAAATAAAGTCCAC  |
| TRAV18, Reaction 1     | CCTGAAAAGTTCAGAAAACAGGAG      | TRAV20, Reaction 2     | CCAGGGTTTTCCAGTCACGACGCCACATTAACAAGAAGGAAAGCT     |
| TRAV19, Reaction 1     | GGTCGGTATCTTGGAACTTCCAG       | TRAV21, Reaction 2     | CCAGGGTTTTCCAGTCACGACGCCCTCGCTGGATAAATCATCAGGA    |
| TRAV20, Reaction 1     | GCTGGGGAAGAAAAGGAGAAAGAAA     | TRAV22, Reaction 2     | CCAGGGTTTTCCAGTCACGACGACTGCTGCTACGGAACGCTA        |
| TRAV21, Reaction 1     | GTCAGAGAGCAAAACAAGTGGAA       | TRAV23, Reaction 2     | CCAGGGTTTTCCAGTCACGACCAACTCTCCTCAAATAAAGTCCCA     |
| TRAV22, Reaction 1     | GGACAAAACAGAATGGAAGATTAAGC    | TRAV24, Reaction 2     | CCAGGGTTTTCCAGTCACGACAGATAAAGTCCACTTTAATACCA      |
| TRAV23, Reaction 1     | CAGAGATGTGATGAAAAGAAAGAG      | TRAV25, Reaction 2     | CCAGGGTTTTCCAGTCACGACTTTGGAGAGAAAAGAAAGACGCT      |
| TRAV24, Reaction 1     | GACTTTAAATGGGATGAAAAGAGA      | TRAV26.1, Reaction 2   | CCAGGGTTTTCCAGTCACGACGAGAAGCAAGGTTCCAGCACCT       |
| TRAV25, Reaction 1     | GGAGAAGTGAAGAAGCAGAAAAGAC     | TRAV26.2, Reaction 2   | CCAGGGTTTTCCAGTCACGACATCGCTGAAGACAGAAAAGTCCAGT    |
| TRAV26.1, Reaction 1   | CCAATGAAATGGCCTCTCTGATCA      | TRAV27, Reaction 2     | CCAGGGTTTTCCAGTCACGACTAACCTTTCAGTTTGGGTGATGCAA    |
| TRAV26.2, Reaction 1   | GCAATGTGAACAACAGAAATGGCCT     | TRAV29, Reaction 2     | CCAGGGTTTTCCAGTCACGACTTAAACAAAAGTCCCAAGCACCTC     |
| TRAV27, Reaction 1     | GCTGAGAGAGTGAAGAACTGAAG       | TRAV30, Reaction 2     | CCAGGGTTTTCCAGTCACGACTTCCATTCATTTAATAAAGAAAGC     |
| TRAV29, Reaction 1     | GGATAAAAATGAAGATGGAAGATTCAC   | TRAV34, Reaction 2     | CCAGGGTTTTCCAGTCACGACCAAGTGGATGAGAAAAGCAGCA       |
| TRAV30, Reaction 1     | CCTGATGATATTAAGGAGGGTGGGA     | TRAV35, Reaction 2     | CCAGGGTTTTCCAGTCACGACTCAGTTTGGTATAACAGAAAGGA      |
| TRAV34, Reaction 1     | GGTGGGGAAGAGAAAAGTTCATGAA     | TRAV36, Reaction 2     | CCAGGGTTTTCCAGTCACGACGGAAGACTAAGTAGCATATAGATAAG   |
| TRAV35, Reaction 1     | GGTGAATTTGACCTCAAATGGAAGAC    | TRAV38, Reaction 2     | CCAGGGTTTTCCAGTCACGACTGTAAGTTCAGGAAAGCAGCA        |
| TRAV36, Reaction 1     | GCTAATTCAGTGAATTTGAAAAGA      | TRAV39, Reaction 2     | CCAGGGTTTTCCAGTCACGACCTCACTTGATACCAAGGCCGT        |
| TRAV38, Reaction 1     | GAGCCTTATAAGCAACAGAATGCAAC    | TRAV40, Reaction 2     | CCAGGGTTTTCCAGTCACGACGCGGAAAATTAAGAAACAAAACTC     |
| TRAV39, Reaction 1     | GGAGCAGTGAAGCAGGAGGGAC        | TRAV41, Reaction 2     | CCAGGGTTTTCCAGTCACGACTTAAATGGCAATAAATCAACACAGG    |
| TRAV40, Reaction 1     | GAGAGACAAATGCAAAACAGCAAAAAC   | TRBV2, Reaction 2      | CCAGGGTTTTCCAGTCACGACGCCCTGATGGATCAAATTTCACTCTG   |
| TRAV41, Reaction 1     | GCTGAGCTCAGGGAAGAAAGAGC       | TRBV3-1, Reaction 2    | CCAGGGTTTTCCAGTCACGACTCTCACCTAAATCTCCAGACAAAGCT   |
| TRBV2, Reaction 1      | CTGAAATATTCGATGATCAATTTCTCAG  | TRBV4, Reaction 2      | CCAGGGTTTTCCAGTCACGACCTGAATGCCCAACAGCTCTC         |
| TRBV3-1, Reaction 1    | TCATATATAAATGAAACAGTTCCAAATCG | TRBV5-4,8, Reaction 2  | CCAGGGTTTTCCAGTCACGACTCTGAGCTGAAGTGAACGCCCT       |
| TRBV4, Reaction 1      | AGTGTGCCAAGTCGTTCTCAC         | TRBV5-1, Reaction 2    | CCAGGGTTTTCCAGTCACGACCGATTTCTCAGGGCCAGTTCTCT      |
| TRBV5-4,8, Reaction 1  | ICAGAGGAAACTYCCCTCCTAGATT     | TRBV6-1, Reaction 2    | CCAGGGTTTTCCAGTCACGACTGGCTACAATGTCTCCAGATTAACAAC  |
| TRBV5-1, Reaction 1    | GAGACACAGAGAAAACAAAGGAACTTC   | TRBV6-2,3, Reaction 2  | CCAGGGTTTTCCAGTCACGACCCCTGATGGCTACAATGTCTCCAGA    |
| TRBV6-1, Reaction 1    | GGTACCATTGACAAAAGGAGAGTCC     | TRBV6-4, Reaction 2    | CCAGGGTTTTCCAGTCACGACTGTGCTCCAGACAAACACAGAGATT    |
| TRBV6-2,3, Reaction 1  | IGAGGGTACAACCTGCCAAGGAGAGGT   | TRBV6-5,6, Reaction 2  | CCAGGGTTTTCCAGTCACGACTCTCCAGATCAACCACAGAGGAT      |
| TRBV6-4, Reaction 1    | GGCAAAGGAGAACTCCTGATGGTT      | TRBV6-8, Reaction 2    | CCAGGGTTTTCCAGTCACGACTCTTAGATTAACACAGAGGATTTCC    |
| TRBV6-5,6, Reaction 1  | IAAGGAGAGTCCCAAATGGGCTACA     | TRBV6-9, Reaction 2    | CCAGGGTTTTCCAGTCACGACTCAATGTATCCAGATCAAACA        |
| TRBV6-8, Reaction 1    | CTGACAAAAGAAAGTCCCAATGGGCTAC  | TRBV7-2, Reaction 2    | CCAGGGTTTTCCAGTCACGACTCGCTTCTCTGAGAGAGGACTGG      |
| TRBV6-9, Reaction 1    | CAGTGCACAAAGGAGAGTCCCCGAT     | TRBV7-3, Reaction 2    | CCAGGGTTTTCCAGTCACGACCGGTTCTTTGAGTCCAGGCTGTA      |
| TRBV7-2, Reaction 1    | AGACAAATCAGGGCTGCCAGTGA       | TRBV7-8, Reaction 2    | CCAGGGTTTTCCAGTCACGACCCAGTGTGCTTCTTTGAGAAA        |
| TRBV7-3, Reaction 1    | GACTCAGGGCTGCCAACGAT          | TRBV7-4,6, Reaction 2  | CCAGGGTTTTCCAGTCACGACTCTCAGCTCTGAACTCTGAGCGCA     |
| TRBV7-8, Reaction 1    | CCAGAAATGAAGTCAACTAGACAA      | TRBV7-7, Reaction 2    | CCAGGGTTTTCCAGTCACGACGCAGAGAGGCTGAGGATCCAT        |
| TRBV7-4,6, Reaction 1  | IGTTCTCTGAGAGAGGCCCTGAG       | TRBV7-9, Reaction 2    | CCAGGGTTTTCCAGTCACGACTGAGAGAGGCCCTAAGGGATCT       |
| TRBV7-7, Reaction 1    | GGCTGCCAGTGTGCTGCTTCTC        | TRBV9, Reaction 2      | CCAGGGTTTTCCAGTCACGACTCCGCACAACAGTCCCTGACTT       |
| TRBV7-9, Reaction 1    | GACTTACTTCCAGAAATGAAGTCAACT   | TRBV10-1,3, Reaction 2 | CCAGGGTTTTCCAGTCACGACAGATGGCTAYAGTGTCTCTAGATCAA   |
| TRBV9, Reaction 1      | GAGCAAAGGAAACATTTCTGAACGATT   | TRBV10-2, Reaction 2   | CCAGGGTTTTCCAGTCACGACTGTGCTCCAGATCCAAGACAGAGAA    |
| TRBV10-1,3, Reaction 1 | GGCTRAATCCATTACTCATATGGTGT    | TRBV11, Reaction 2     | CCAGGGTTTTCCAGTCACGACGCAGAGAGGCTCAAAGAGTATGAT     |
| TRBV10-2, Reaction 1   | GATAAAGGAGAACTCCCCGATGGCT     | TRBV12-3,4, Reaction 2 | CCAGGGTTTTCCAGTCACGACTAAGATGCTTCAATGATCACTTCT     |
| TRBV11, Reaction 1     | GATTCACAGTTGCCAATGAGATCGAT    | TRBV12-5, Reaction 2   | CCAGGGTTTTCCAGTCACGACTCAGCAGAGATGCTTCAATGCAACT    |
| TRBV12-3,4, Reaction 1 | GATTCAGGGATGCCCGAGGATCG       | TRBV13, Reaction 2     | CCAGGGTTTTCCAGTCACGACTCTCAGCTCAACAGTTCAAGTACTA    |
| TRBV12-5, Reaction 1   | GATTCGGGGATGCCGAAGGATCG       | TRBV14, Reaction 2     | CCAGGGTTTTCCAGTCACGACTGAAAGGACTGGAGGGAGCTAT       |
| TRBV13, Reaction 1     | GCAGAGCGATAAAGGAAGCATCCCT     | TRBV15, Reaction 2     | CCAGGGTTTTCCAGTCACGACTCAACTCTGAACTCTGAGAGGCGC     |
| TRBV14, Reaction 1     | TCCGGTATGCCCAACAATCGATTCT     | TRBV16, Reaction 2     | CCAGGGTTTTCCAGTCACGACGCTAAGTGCCTCCAAATTCACCC      |
| TRBV15, Reaction 1     | GATTTTAAACAAATGAAGCAGACCCCT   | TRBV18, Reaction 2     | CCAGGGTTTTCCAGTCACGACGGAACGATTTCTGCTGAATTTCCCA    |
| TRBV16, Reaction 1     | GATGAAACAGGTATGCCCAAGGAAAG    | TRBV19, Reaction 2     | CCAGGGTTTTCCAGTCACGACGGTACAGGCTCTCCGGGAGAAGA      |
| TRBV18, Reaction 1     | TATCATAGATGAGTCAGGAATGCCAAAG  | TRBV20-1, Reaction 2   | CCAGGGTTTTCCAGTCACGACGCAAAAGTTCCTCATCAACCATGCAA   |
| TRBV19, Reaction 1     | GACTTTCAGAAAGGAGATATAGCTGAA   | TRBV24-1, Reaction 2   | CCAGGGTTTTCCAGTCACGACTGGATACAGTGTCTCTCCAGAGGC     |
| TRBV20-1, Reaction 1   | CAAGGCCACATACGACCAAGGCCCT     | TRBV25-1, Reaction 2   | CCAGGGTTTTCCAGTCACGACCAACAGTCTCCAGATAAGGACGGA     |
| TRBV24-1, Reaction 1   | CAAAGATATAAACAAGGAGAGATCTCT   | TRBV27-1, Reaction 2   | CCAGGGTTTTCCAGTCACGACTCAAAAGTCTCTGAAAAGAGAAGAGGA  |
| TRBV25-1, Reaction 1   | AGAGAAGGGAGATCTTTCTCTGAGT     | TRBV28, Reaction 2     | CCAGGGTTTTCCAGTCACGACGGGTACAGTGTCTCTAGAGAGA       |
| TRBV27-1, Reaction 1   | GACTGATAAAGGAGATGTTCTCTGAG    | TRBV29, Reaction 2     | CCAGGGTTTTCCAGTCACGACTTTCCATCAGCCGCCAAACCTA       |
| TRBV28, Reaction 1     | GGCTGATCTATTTCTCATATGATGTTAA  | TRBV30, Reaction 2     | CCAGGGTTTTCCAGTCACGACCCAGCCAGGACCCGAGTTCAT        |
| TRBV29, Reaction 1     | GCCACATATGAGAGTGGATTTGTCAAT   | TRAC, Reaction 2       | CAGACAGACTTGTCTGATGATTTAG                         |
| TRBV30, Reaction 1     | GGTGCCCAAGATCTCTCAGCCT        | TRBC, Reaction 2       | CTTTTGGGTGGGAGATCTCTG                             |
| TRAC, Reaction 1       | CGTGAATAGGCAGACAGACTTGT       |                        |                                                   |
| TRBC, Reaction 1       | ACCAGTGTGGCCTTTTGGGTGTG       |                        |                                                   |

## Supplementary Table 1. TCR sequencing primers for first two PCR reactions. Common sequences are indicated in bold.

## Supplementary Table 3

|                      |                                                                 |
|----------------------|-----------------------------------------------------------------|
| <b>AlphaBC1</b>      | CTGCTGAACCGCTCTTCCGATCTNN <b>GTT</b> CAGTCACTGGATTTAGAGTCTCTCAG |
| <b>AlphaBC2</b>      | CTGCTGAACCGCTCTTCCGATCTNN <b>CAGG</b> AGTCACTGGATTTAGAGTCTCTCAG |
| <b>AlphaBC3</b>      | CTGCTGAACCGCTCTTCCGATCTNN <b>TTATA</b> GTCACTGGATTTAGAGTCTCTCAG |
| <b>AlphaBC4</b>      | CTGCTGAACCGCTCTTCCGATCTNN <b>CCTGT</b> GTCACTGGATTTAGAGTCTCTCAG |
| <b>AlphaBC5</b>      | CTGCTGAACCGCTCTTCCGATCTNN <b>ACC</b> CGTCACTGGATTTAGAGTCTCTCAG  |
| <b>AlphaBC6</b>      | CTGCTGAACCGCTCTTCCGATCTNN <b>ACTT</b> AGTCACTGGATTTAGAGTCTCTCAG |
| <b>AlphaBC7</b>      | CTGCTGAACCGCTCTTCCGATCTNN <b>GCT</b> AGGTCACTGGATTTAGAGTCTCTCAG |
| <b>AlphaBC8</b>      | CTGCTGAACCGCTCTTCCGATCTNN <b>GACGT</b> GTCACTGGATTTAGAGTCTCTCAG |
| <b>AlphaBC9</b>      | CTGCTGAACCGCTCTTCCGATCTNN <b>GGCT</b> AGTCACTGGATTTAGAGTCTCTCAG |
| <b>AlphaBC10</b>     | CTGCTGAACCGCTCTTCCGATCTNN <b>GAATG</b> GTCACTGGATTTAGAGTCTCTCAG |
| <b>AlphaBC11</b>     | CTGCTGAACCGCTCTTCCGATCTNN <b>CCAAC</b> GTCACTGGATTTAGAGTCTCTCAG |
| <b>AlphaBC12</b>     | CTGCTGAACCGCTCTTCCGATCTNN <b>GAGAC</b> GTCACTGGATTTAGAGTCTCTCAG |
| <b>BetaBC1</b>       | CTGCTGAACCGCTCTTCCGATCTNN <b>GTT</b> CAGAGATCTCTGCTTCTGATGGCTC  |
| <b>BetaBC2</b>       | CTGCTGAACCGCTCTTCCGATCTNN <b>CAGG</b> AGAGATCTCTGCTTCTGATGGCTC  |
| <b>BetaBC3</b>       | CTGCTGAACCGCTCTTCCGATCTNN <b>TTATA</b> AGAGATCTCTGCTTCTGATGGCTC |
| <b>BetaBC4</b>       | CTGCTGAACCGCTCTTCCGATCTNN <b>CCTGT</b> GAGATCTCTGCTTCTGATGGCTC  |
| <b>BetaBC5</b>       | CTGCTGAACCGCTCTTCCGATCTNN <b>ACC</b> CGAGAGATCTCTGCTTCTGATGGCTC |
| <b>BetaBC6</b>       | CTGCTGAACCGCTCTTCCGATCTNN <b>ACTT</b> AGAGATCTCTGCTTCTGATGGCTC  |
| <b>BetaBC7</b>       | CTGCTGAACCGCTCTTCCGATCTNN <b>GCT</b> AGGAGATCTCTGCTTCTGATGGCTC  |
| <b>BetaBC8</b>       | CTGCTGAACCGCTCTTCCGATCTNN <b>GACGT</b> GAGATCTCTGCTTCTGATGGCTC  |
| <b>BetaBC9</b>       | CTGCTGAACCGCTCTTCCGATCTNN <b>GGCT</b> AGAGATCTCTGCTTCTGATGGCTC  |
| <b>BetaBC10</b>      | CTGCTGAACCGCTCTTCCGATCTNN <b>GAATG</b> GAGATCTCTGCTTCTGATGGCTC  |
| <b>BetaBC11</b>      | CTGCTGAACCGCTCTTCCGATCTNN <b>CCAAC</b> GAGATCTCTGCTTCTGATGGCTC  |
| <b>BetaBC12</b>      | CTGCTGAACCGCTCTTCCGATCTNN <b>GAGAC</b> GAGATCTCTGCTTCTGATGGCTC  |
| <b>PhenotypeBC1</b>  | CTGCTGAACCGCTCTTCCGATCTNN <b>GTTCA</b> AGCGGATAACAATTTACACAGGA  |
| <b>PhenotypeBC2</b>  | CTGCTGAACCGCTCTTCCGATCTNN <b>CAGGA</b> AGCGGATAACAATTTACACAGGA  |
| <b>PhenotypeBC3</b>  | CTGCTGAACCGCTCTTCCGATCTNN <b>TTATA</b> AGCGGATAACAATTTACACAGGA  |
| <b>PhenotypeBC4</b>  | CTGCTGAACCGCTCTTCCGATCTNN <b>CCTGT</b> AGCGGATAACAATTTACACAGGA  |
| <b>PhenotypeBC5</b>  | CTGCTGAACCGCTCTTCCGATCTNN <b>ACC</b> CGAGCGGATAACAATTTACACAGGA  |
| <b>PhenotypeBC6</b>  | CTGCTGAACCGCTCTTCCGATCTNN <b>ACTTA</b> AGCGGATAACAATTTACACAGGA  |
| <b>PhenotypeBC7</b>  | CTGCTGAACCGCTCTTCCGATCTNN <b>GCT</b> AGAGCGGATAACAATTTACACAGGA  |
| <b>PhenotypeBC8</b>  | CTGCTGAACCGCTCTTCCGATCTNN <b>GACGT</b> AGCGGATAACAATTTACACAGGA  |
| <b>PhenotypeBC9</b>  | CTGCTGAACCGCTCTTCCGATCTNN <b>GGCTA</b> AGCGGATAACAATTTACACAGGA  |
| <b>PhenotypeBC10</b> | CTGCTGAACCGCTCTTCCGATCTNN <b>GAATG</b> AGCGGATAACAATTTACACAGGA  |
| <b>PhenotypeBC11</b> | CTGCTGAACCGCTCTTCCGATCTNN <b>CCAAC</b> AGCGGATAACAATTTACACAGGA  |
| <b>PhenotypeBC12</b> | CTGCTGAACCGCTCTTCCGATCTNN <b>GAGAC</b> AGCGGATAACAATTTACACAGGA  |
| <b>PEprimer1</b>     | AATGATACGGCGACCACCGAGATCTACACTCTTCCCTACACGACGCTCTTCCGATCT       |
| <b>PEprimer2</b>     | AAGCAGAAGACGGCATAACGAGATCGGTCTCGGCATTCTGCTGAACCGCTCTTCCGATCT    |

**Supplementary Table 3. Column barcoding primers used for the third PCR reaction and Illumina™ paired-end primers.**

## Supplementary Table 5

| Well | TCR beta |         |                    |      | TCR alpha (primary) |        |                   |      | TCR alpha (secondary) |        |                  |     |
|------|----------|---------|--------------------|------|---------------------|--------|-------------------|------|-----------------------|--------|------------------|-----|
|      | V-gene   | J-gene  | CDR3               | #    | V-gene              | J-gene | CDR3              | #    | V-gene                | J-gene | CDR3             | #   |
| E12  | TRBV9    | TRBJ1-5 | CASSAGPKNQPHF      | 4781 | TRAV12-2            | TRAJ23 | CAVRNQGGKLIF      | 2058 |                       |        |                  |     |
| F8   | TRBV9    | TRBJ1-5 | CASSAGPKNQPHF      | 1773 | TRAV12-2            | TRAJ23 | CAVRNQGGKLIF      | 1062 |                       |        |                  |     |
| A6   | TRBV4-2  | TRBJ2-7 | CASSPGAIEGISYEQYF  | 3832 | TRAV12-3            | TRAJ5  | CAMSLRSRTGRRALTF  | 895  |                       |        |                  |     |
| E9   | TRBV4-2  | TRBJ2-7 | CASSPGAIEGISYEQYF  | 7550 | TRAV12-3            | TRAJ5  | CAMSLRSRTGRRALTF  | 474  |                       |        |                  |     |
| B2   | TRBV28   | TRBJ2-2 | CASSYGDPPGGLDGELFF | 2157 | TRAV27              | TRAJ39 | non-productive    | 878  | TRAV8-4               | TRAJ48 | CAVSLISNFGNEKLTF | 866 |
| E1   | TRBV28   | TRBJ2-2 | CASSYGDPPGGLDGELFF | 3222 | TRAV8-4             | TRAJ48 | CAVSLISNFGNEKLTF  | 1286 |                       |        |                  |     |
| H3   | TRBV28   | TRBJ2-2 | CASSYGDPPGGLDGELFF | 97   | TRAV8-4             | TRAJ48 | CAVSLISNFGNEKLTF  | 59   | TRAV27                | TRAJ39 | non-productive   | 16  |
| E5   | TRBV30   | TRBJ2-1 | CAWTLGGNEQFF       | 4272 | TRAV13-1            | TRAJ45 | CAASRSTAGGGADGLTF | 563  | TRAV22                | TRAJ9  | CAGRAGGFKTIF     | 276 |
| E7   | TRBV30   | TRBJ2-1 | CAWTLGGNEQFF       | 7412 | TRAV13-1            | TRAJ45 | CAASRSTAGGGADGLTF | 78   | TRAV22                | TRAJ9  | CAGRAGGFKTIF     | 33  |
| G1   | TRBV30   | TRBJ2-1 | CAWTLGGNEQFF       | 258  | TRAV13-1            | TRAJ45 | CAASRSTAGGGADGLTF | 42   | TRAV22                | TRAJ9  | CAGRAGGFKTIF     | 38  |
| H10  | TRBV30   | TRBJ2-1 | CAWTLGGNEQFF       | 204  | TRAV13-1            | TRAJ45 | CAASRSTAGGGADGLTF | 31   | TRAV22                | TRAJ9  | CAGRAGGFKTIF     | 16  |

**Supplementary Table 5. Determination of two TCR $\alpha$  genes from single T cells.** Four T cell clones were clonally expanded and repeated within the TCR validation set. Multiple TCR $\alpha$  chains were detected in two of these clones. Well location, V and J gene usage, CDR3 sequence, and number of reads are indicated.

## Supplementary Table 7

|              | # positive /60 positive | Sensitivity | # positive /36 negative | Specificity | Prevalence (% positive CD45RO/total CD45RO) | Positive predictive value | Negative predictive value |
|--------------|-------------------------|-------------|-------------------------|-------------|---------------------------------------------|---------------------------|---------------------------|
| IFN $\gamma$ | 55                      | 91.67%      | 0                       | 100.00%     | 6.25%                                       | 100.00%                   | 99.40%                    |
| TNF $\alpha$ | 46                      | 76.67%      | 2                       | 94.44%      | 35.48%                                      | 88.30%                    | 88.00%                    |
| IL2          | 58                      | 96.67%      | 1                       | 97.22%      | 65.70%                                      | 98.50%                    | 93.89%                    |
| IL10         | 50                      | 83.33%      | 1                       | 97.22%      | 2.46%                                       | 43.10%                    | 99.60%                    |
| IL13         | 56                      | 93.33%      | 0                       | 100.00%     | 26.03%                                      | 100.00%                   | 97.70%                    |
| IL17         | 49                      | 81.67%      | 0                       | 100.00%     | 4.26%                                       | 100.00%                   | 99.20%                    |
| FOXP3        | 54                      | 90.00%      | 0                       | 100.00%     | 3.80%                                       | 100.00%                   | 99.62%                    |

**Supplementary Table 7. Sensitivity, specificity, positive and negative predictive value of single-cell phenotypic detection compared to cytokine capture assays and CD25 expression in the case of FOXP3.**

## Supplementary Information. Explanation of software for analysis

Paired end fastq files are unpacked and joined by shared regions of overlap. The resulting joined reads are converted to fasta. Paired end fasta files are demultiplexed as [barcode-demultiplex.pl](#) --dnafile=<joinedfile.fasta>

DNA sequence file in fasta format to produce individual files for each plate/well.  
Usage: [./barcode-demultiplex.pl](#) --dnafile

Each well is then analyzed with [well-vdjfasta.pl](#) --file=<joinedfile-<plate><well>.fa  
Usage: [./well-vdjfasta.pl](#)

--file=seqs.fasta   input dna file in fasta  
--dna=1            output a header-annotated dna fasta file  
--aa=1             output a header-annotated aa fasta file  
--c2m=1            output a header-annotated c2m fasta file  
--verbose=1        produce verbose messages while running  
--vdb="alt.fasta"  alternative variable segment blast database  
--ddb="alt.fasta"  alternative D segment blast database  
--jdb="alt.fasta"  alternative J segment blast database  
--cdb="alt.fasta"  alternative constant segment blast database

Each well is then profiled using  
[cell-profiler.pl](#) --file=<joinedfile-<plate><well>.dnaH3.fasta

Usage: [./cell-profiler.pl](#)  
--file            dna sequence file in fasta format  
--do\_cytokines   optionally analyze cytokines  
--min\_depth      minimum depth for reporting a cytokine or chain  
--min\_percenth   minimum percent dominance for asserting beta chain  
--min\_percentl1   minimum percent dominance for asserting first alpha chain  
--min\_percentl2   minimum percent dominance for asserting possible second  
alpha chain
